# Supplementary material
Source: PubMed Central journal article supplement (PMC6063492)
Supplement: jci-128-98319-s028.pdf [file jci-128-98319-s028.pdf]

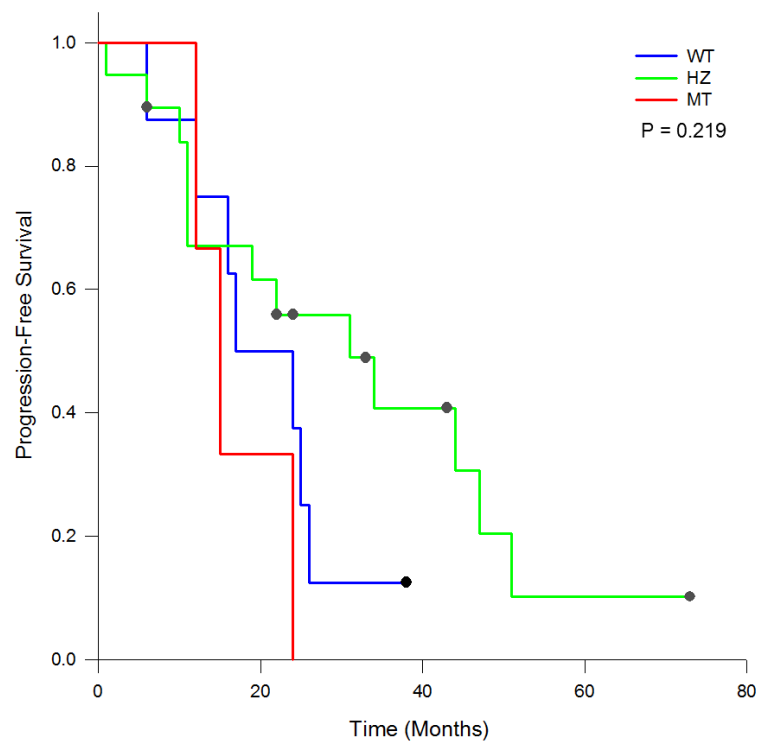

**Fig S1.** Progression-free survival on treatment with abiraterone acetate and *HSD3B1* genotype.



Table S2. Metabolite concentrations (ng/ml) according to *HSD3B1* genotype in patients with castration-resistant prostate cancer

| Genotype | Dose to Draw (H:Min)* | Treatment Duration (Months) | Abiraterone | D4A  | 3-Keto-5 $\alpha$ -Abi | 3 $\alpha$ -OH-5 $\alpha$ -Abi | 3 $\beta$ -OH-5 $\alpha$ -Abi | 3-Keto-5 $\beta$ -Abi | 3 $\alpha$ -OH-5 $\beta$ -Abi | 3 $\beta$ -OH-5 $\beta$ -Abi |
|----------|-----------------------|-----------------------------|-------------|------|------------------------|--------------------------------|-------------------------------|-----------------------|-------------------------------|------------------------------|
| WT 1     | 01:30                 | 24                          | 15.75       | 0.96 | 6.99                   | 1.77                           | 0.58                          | 7.08                  | 10.19                         | 22.54                        |
| WT 2     | 02:15                 | 2                           | 65.09       | 3.66 | 1.73                   | 0.30                           | 0.27                          | 8.72                  | 8.01                          | 19.39                        |
| WT 3     | 02:15                 | 12                          | 39.98       | 1.28 | 3.46                   | 0.23                           | 0.11                          | 6.46                  | 2.04                          | 3.08                         |
| WT 4     | 02:20                 | 1                           | 105.62      | 3.69 | 6.64                   | 0.89                           | 0.68                          | 16.27                 | 24.48                         | 19.87                        |
| WT 5     | 05:00                 | 8                           | 12.96       | 0.77 | 2.25                   | 0.48                           | 0.16                          | 2.50                  | 3.98                          | 6.75                         |
| WT 6     | 07:30                 | 13                          | 21.50       | 1.29 | 1.04                   | 0.26                           | 0.12                          | 4.48                  | 5.52                          | 12.54                        |
| WT 7     | 10:45                 | 5                           | 19.24       | 0.52 | 1.22                   | 0.37                           | 0.15                          | 1.28                  | 3.83                          | 4.33                         |
| WT 8     | 14:45                 | 11                          | 52.70       | 3.15 | 3.11                   | 1.15                           | 0.44                          | 2.37                  | 9.17                          | 7.58                         |
|          |                       |                             |             |      |                        |                                |                               |                       |                               |                              |
| HZ 1     | 02:00                 | 32                          | 8.64        | 1.28 | 1.36                   | 0.42                           | 0.12                          | 2.43                  | 6.46                          | 9.42                         |
| HZ 2     | 02:15                 | 39                          | 40.49       | 2.05 | 9.07                   | 1.30                           | 0.39                          | 4.37                  | 4.90                          | 5.71                         |
| HZ 3     | 02:30                 | 26                          | 48.45       | 1.29 | 10.66                  | 1.16                           | 0.52                          | 5.95                  | 3.44                          | 6.86                         |
| HZ 4     | 03:15                 | 21                          | 70.67       | 3.85 | 8.80                   | 1.98                           | 0.53                          | 5.85                  | 9.06                          | 10.89                        |
| HZ 5     | 05:00                 | 3                           | 81.90       | 4.11 | 6.73                   | 1.13                           | 0.40                          | 21.74                 | 22.28                         | 19.10                        |
| HZ 6     | 05:15                 | 3                           | 56.45       | 3.17 | 7.66                   | 1.74                           | 0.54                          | 7.63                  | 14.58                         | 19.10                        |
| HZ 7     | 05:30                 | 1                           | 53.39       | 1.06 | 7.71                   | 0.88                           | 0.33                          | 5.47                  | 2.71                          | 4.22                         |
| HZ 8     | 06:15                 | 3                           | 14.97       | 1.58 | 3.70                   | 0.92                           | 0.28                          | 6.94                  | 8.72                          | 10.84                        |
| HZ 9     | 06:45                 | 1                           | 43.41       | 3.67 | 20.48                  | 5.87                           | 4.14                          | 12.74                 | 22.04                         | 19.06                        |
| HZ 10    | 08:30                 | 2                           | 16.71       | 1.25 | 8.10                   | 1.93                           | 0.45                          | 8.08                  | 9.84                          | 15.19                        |
| HZ 11    | 09:30                 | 1                           | 33.65       | 1.54 | 3.21                   | 1.22                           | 0.35                          | 0.83                  | 2.45                          | 2.06                         |
| HZ 12    | 09:30                 | 1                           | 23.67       | 2.42 | 2.49                   | 0.65                           | 0.19                          | 4.22                  | 6.71                          | 5.94                         |
| HZ 13    | 10:30                 | 39                          | 60.64       | 2.49 | 10.96                  | 2.82                           | 0.78                          | 7.15                  | 11.11                         | 10.76                        |
| HZ 14    | 11:30                 | 2                           | 38.90       | 2.58 | 4.65                   | 1.29                           | 0.53                          | 6.69                  | 10.37                         | 11.87                        |
| HZ 15    | 11:45                 | 22                          | 6.02        | 0.75 | 0.13                   | 0.10                           | 0.10                          | 1.52                  | 3.30                          | 3.33                         |
| HZ 16    | 12:00                 | 5                           | 67.98       | 3.59 | 5.36                   | 1.11                           | 0.44                          | 16.54                 | 12.53                         | 27.29                        |
| HZ 17    | 12:15                 | 11                          | 41.22       | 3.71 | 11.04                  | 2.27                           | 0.77                          | 25.76                 | 21.59                         | 37.91                        |
| HZ 18    | 12:15                 | 25                          | 19.06       | 1.14 | 4.66                   | 1.21                           | 0.34                          | 11.54                 | 10.95                         | 12.50                        |
| HZ 19    | 15:45                 | 2                           | 66.69       | 2.83 | 8.71                   | 2.88                           | 0.88                          | 4.29                  | 10.53                         | 12.34                        |
|          |                       |                             |             |      |                        |                                |                               |                       |                               |                              |
| MT 1     | 08:15                 | 21                          | 61.47       | 4.54 | 9.88                   | 1.73                           | 0.60                          | 14.77                 | 11.85                         | 24.32                        |
| MT 2     | 12:15                 | 8                           | 52.41       | 3.17 | 10.89                  | 2.83                           | 0.88                          | 8.97                  | 10.57                         | 19.10                        |
| MT 3     | 14:15                 | 5                           | 31.48       | 3.07 | 20.28                  | 6.42                           | 1.99                          | 7.89                  | 19.94                         | 15.87                        |

\*Time from last AA dose to blood draw

WT = wild-type

HZ = heterozygous mutant

MT = homozygous mutant

Table S3. Polyserial correlation of normalized abiraterone metabolite concentrations (ng/mL) and *HSD3B1* genotype based on normalization to the 4 hour PK time point.

| Abiraterone/metabolite         | WT<br>(8 pts) | HZ<br>(19 pts) | MT<br>(3 pts) | Correlation<br>coefficient<br>( $\rho$ ) | p-value |
|--------------------------------|---------------|----------------|---------------|------------------------------------------|---------|
| Abiraterone                    | 35.53         | 56.51          | 26.15         | 0.04                                     | 0.85    |
| D4A                            | 0.29          | 0.50           | 0.17          | 0.15                                     | 0.48    |
| 3-keto-5 $\alpha$ -Abi         | 0.07          | 7.05           | 7.35          | 0.49                                     | 0.002   |
| 3 $\alpha$ -OH-5 $\alpha$ -Abi | 0.05          | 1.11           | 1.64          | 0.56                                     | 0.0001  |
| 3 $\beta$ -OH-5 $\alpha$ -Abi  | 0.12          | 0.39           | 0.80          | 0.46                                     | 0.006   |
| 3-keto-5 $\beta$ -Abi          | 0.15          | 0.64           | 0.17          | 0.13                                     | 0.55    |
| 3 $\alpha$ -OH-5 $\beta$ -Abi  | 0.49          | 0.80           | 1.66          | 0.31                                     | 0.10    |
| 3 $\beta$ -OH-5 $\beta$ -Abi   | 0.46          | 1.29           | 0.91          | 0.17                                     | 0.41    |

Table S4. Results from Anova test and Tukey's Honest Significant Difference (HSD) pairwise comparisons of mean metabolite concentration values between genotypes (including point estimates of mean differences and their 95% confidence intervals)

| Abiraterone/<br>metabolite     | ANOVA<br>p-value | Tukey's Honest Significant Difference (HSD) |                     |                     |
|--------------------------------|------------------|---------------------------------------------|---------------------|---------------------|
|                                |                  | HZ – WT [95% CI]                            | MT – WT [95% CI]    | MT – HZ [95% CI]    |
| Abiraterone                    | 0.674            | 6.45 [-14.2, 27.1]                          | -2.19 [-35.4, 31.0] | -8.64 [-39.1, 21.9] |
| D4A                            | 0.661            | 0.09 [-0.14, 0.33]                          | 0.07 [-0.32, 0.45]  | -0.03 [-0.38, 0.32] |
| 3-keto-5 $\alpha$ -Abi         | 0.044            | 2.14 [0.17, 4.10]                           | 2.51 [-0.65, 5.67]  | 0.37 [-2.53, 3.27]  |
| 3 $\alpha$ -OH-5 $\alpha$ -Abi | 0.025            | 0.89 [0.07, 1.70]                           | 1.35 [0.05, 2.66]   | 0.47 [-0.73, 1.67]  |
| 3 $\beta$ -OH-5 $\alpha$ -Abi  | 0.107            | 0.23 [-0.07, 0.53]                          | 0.40 [-0.08, 0.87]  | 0.16 [-0.28, 0.60]  |
| 3-keto-5 $\beta$ -Abi          | 0.785            | 0.11 [-0.26, 0.49]                          | 0.10 [-0.51, 0.70]  | -0.01 [-0.57, 0.54] |
| 3 $\alpha$ -OH-5 $\beta$ -Abi  | 0.347            | 0.33 [-0.29, 0.94]                          | 0.54 [-0.44, 1.52]  | 0.21 [-0.69, 1.12]  |
| 3 $\beta$ -OH-5 $\beta$ -Abi   | 0.748            | 0.51 [-1.74, 2.74]                          | 1.13 [-2.47, 4.74]  | 0.63 [-2.68, 3.93]  |

Table S5. P-values before multiple testing correction and their false discovery rates (FDRs) calculated by Benjamini and Hochberg method\*

| Abiraterone/metabolite         | p-values from individual tests | FDR     |
|--------------------------------|--------------------------------|---------|
| Abiraterone                    | 0.850                          | 0.850   |
| D4A                            | 0.476                          | 0.623   |
| 3-keto-5 $\alpha$ -Abi         | 0.0025                         | 0.01    |
| 3 $\alpha$ -OH-5 $\alpha$ -Abi | 0.00012                        | 0.00094 |
| 3 $\beta$ -OH-5 $\alpha$ -Abi  | 0.00667                        | 0.0178  |
| 3-keto-5 $\beta$ -Abi          | 0.546                          | 0.623   |
| 3 $\alpha$ -OH-5 $\beta$ -Abi  | 0.0958                         | 0.192   |
| 3 $\beta$ -OH-5 $\beta$ -Abi   | 0.411                          | 0.623   |

\*Benjamini, Yoav; Hochberg, Yosef (1995). "Controlling the false discovery rate: a practical and powerful approach to multiple testing". Journal of the Royal Statistical Society, Series B. 57 (1): 289–300.
